# Supplementary material for: Associations between circulating interferon and kynurenine/tryptophan pathway metabolites: support for a novel potential mechanism for cognitive dysfunction in SLE
Source: PubMed Central journal article supplement — Lupus Sci Med. 2022 Nov 16;9(1):e000808. doi: 10.1136/lupus-2022-000808 (PMC9670923; doi:10.1136/lupus-2022-000808), 2022-11-16
Supplement: lupus-2022-000808supp001.pdf [file lupus-2022-000808supp001.pdf]

## Supplementary Data

**Supplemental Table 1: List of 144 Genes that Positively Correlated with the KYN/TRP Ratio.** The first 71 listed genes, in **bold**, indicate interferon-stimulated genes. Gene ontology (GO) of the remaining 73 genes that correlated with the KYN/TRP ratio revealed genes associated with cell movement, including microtubules and motile cilia; notably, increased kynurenine has been associated with increased expression of cytoskeletal proteins that enhance cell motility in mice.[1] The GO analysis also revealed genes involved in muscle tissue generation and organization, as well as embryo implantation.

| Gene             | $r_s$ | p     |
|------------------|-------|-------|
| <b>ACVRL1</b>    | 0.267 | 0.023 |
| <b>ATF3</b>      | 0.344 | 0.003 |
| <b>BST2</b>      | 0.397 | 0.001 |
| <b>C1QA</b>      | 0.300 | 0.010 |
| <b>C1QB</b>      | 0.326 | 0.005 |
| <b>C1QC</b>      | 0.294 | 0.012 |
| <b>CDK1</b>      | 0.294 | 0.012 |
| <b>CRYM</b>      | 0.282 | 0.016 |
| <b>DHX58</b>     | 0.262 | 0.026 |
| <b>EPSTI1</b>    | 0.274 | 0.020 |
| <b>ETV7</b>      | 0.321 | 0.006 |
| <b>EXOC3L1</b>   | 0.297 | 0.011 |
| <b>FBXO6</b>     | 0.247 | 0.037 |
| <b>GBP1</b>      | 0.261 | 0.027 |
| <b>GBP1P1</b>    | 0.295 | 0.012 |
| <b>HBQ1</b>      | 0.304 | 0.009 |
| <b>HERC6</b>     | 0.263 | 0.026 |
| <b>HES4</b>      | 0.385 | 0.001 |
| <b>HESX1</b>     | 0.233 | 0.049 |
| <b>HIST1H2BO</b> | 0.272 | 0.021 |
| <b>HIST1H4H</b>  | 0.307 | 0.009 |
| <b>IFI27</b>     | 0.367 | 0.002 |
| <b>IFI35</b>     | 0.290 | 0.013 |
| <b>IFI44</b>     | 0.244 | 0.039 |
| <b>IFI44L</b>    | 0.299 | 0.011 |
| <b>IFI6</b>      | 0.342 | 0.003 |
| <b>IFIT1</b>     | 0.238 | 0.044 |
| <b>IFIT1B</b>    | 0.233 | 0.049 |
| <b>IFIT3</b>     | 0.254 | 0.031 |
| <b>IFITM1</b>    | 0.284 | 0.016 |
| <b>IFITM3</b>    | 0.234 | 0.048 |
| <b>IRF7</b>      | 0.319 | 0.007 |
| <b>ISG15</b>     | 0.315 | 0.007 |
| <b>KLHDC7B</b>   | 0.356 | 0.002 |

|             |       |        |
|-------------|-------|--------|
| LAP3        | 0.283 | 0.016  |
| LGALS3BP    | 0.290 | 0.014  |
| LRRC2       | 0.406 | <0.001 |
| LY6E        | 0.267 | 0.024  |
| MDK         | 0.238 | 0.044  |
| MOV10       | 0.356 | 0.002  |
| MS4A4A      | 0.297 | 0.011  |
| MT2A        | 0.402 | <0.001 |
| MX1         | 0.242 | 0.041  |
| NEXN        | 0.295 | 0.012  |
| NRN1        | 0.252 | 0.033  |
| OAS1        | 0.330 | 0.005  |
| ODF3B       | 0.317 | 0.007  |
| PARP10      | 0.299 | 0.011  |
| PARP12      | 0.265 | 0.024  |
| PTTG1       | 0.256 | 0.030  |
| RMI2        | 0.360 | 0.002  |
| RTP4        | 0.307 | 0.009  |
| SCO2        | 0.370 | 0.001  |
| SERPING1    | 0.268 | 0.023  |
| SGIP1       | 0.266 | 0.024  |
| SIGLEC1     | 0.237 | 0.045  |
| SPATS2L     | 0.286 | 0.015  |
| STAT2       | 0.236 | 0.046  |
| TIMM10      | 0.335 | 0.004  |
| TK1         | 0.344 | 0.003  |
| TMCC2       | 0.319 | 0.006  |
| TMEM45A     | 0.265 | 0.024  |
| TPX2        | 0.248 | 0.036  |
| TREX1       | 0.355 | 0.002  |
| TRHDE-AS1   | 0.238 | 0.044  |
| UBE2L6      | 0.269 | 0.022  |
| UBQLNL      | 0.260 | 0.027  |
| USP18       | 0.268 | 0.023  |
| USP41       | 0.270 | 0.022  |
| XAF1        | 0.302 | 0.010  |
| ZNF684      | 0.251 | 0.033  |
| ABCC13      | 0.288 | 0.014  |
| AC007016.3  | 0.267 | 0.023  |
| AC067945.3  | 0.371 | 0.001  |
| AC068831.16 | 0.246 | 0.038  |
| AC074338.4  | 0.275 | 0.019  |
| ACOD1       | 0.298 | 0.011  |

|                |       |       |
|----------------|-------|-------|
| AL137860.1     | 0.258 | 0.029 |
| ANO7P1         | 0.372 | 0.001 |
| AP000662.4     | 0.297 | 0.011 |
| AP001627.1     | 0.250 | 0.034 |
| BISPR          | 0.309 | 0.008 |
| CDH6           | 0.238 | 0.044 |
| CKAP2L         | 0.328 | 0.005 |
| CRAT37         | 0.332 | 0.004 |
| CTA-384D8.31   | 0.277 | 0.018 |
| CTA-384D8.35   | 0.281 | 0.017 |
| CTA-384D8.36   | 0.350 | 0.003 |
| CTD-2047H16.2  | 0.287 | 0.015 |
| CTD-2095E4.5   | 0.233 | 0.049 |
| CTD-2521M24.13 | 0.248 | 0.036 |
| CTD-2521M24.4  | 0.341 | 0.003 |
| CTD-2521M24.8  | 0.359 | 0.002 |
| CTD-2561J22.5  | 0.304 | 0.009 |
| FAM155B        | 0.294 | 0.012 |
| GAPDHP66       | 0.263 | 0.026 |
| GTSE1          | 0.252 | 0.033 |
| HBM            | 0.369 | 0.001 |
| HCG9           | 0.289 | 0.014 |
| HMP19          | 0.267 | 0.024 |
| IFITM9P        | 0.305 | 0.009 |
| KLC3           | 0.311 | 0.008 |
| LA16c-17H1.3   | 0.273 | 0.020 |
| LARP1P1        | 0.279 | 0.018 |
| LIF            | 0.390 | 0.001 |
| LINC01296      | 0.251 | 0.033 |
| LLNLR-271C9.1  | 0.267 | 0.023 |
| MAFA           | 0.254 | 0.032 |
| MTND3P10       | 0.265 | 0.024 |
| MTND4LP14      | 0.245 | 0.038 |
| MTND4P26       | 0.254 | 0.032 |
| MYBL2          | 0.272 | 0.021 |
| NRIR           | 0.263 | 0.025 |
| OLFM5P         | 0.232 | 0.049 |
| OR2B6          | 0.242 | 0.040 |
| OR51AB1P       | 0.375 | 0.001 |
| OR52B3P        | 0.248 | 0.036 |
| RABGAP1L-IT1   | 0.270 | 0.022 |
| RNY3P8         | 0.279 | 0.018 |
| RP1-221C16.8   | 0.255 | 0.031 |

|               |       |       |
|---------------|-------|-------|
| RP1-71H24.1   | 0.330 | 0.005 |
| RP1-99E18.2   | 0.245 | 0.038 |
| RP11-20D14.6  | 0.350 | 0.003 |
| RP11-273G15.2 | 0.334 | 0.004 |
| RP11-288L9.1  | 0.411 | 0.000 |
| RP11-288L9.4  | 0.234 | 0.048 |
| RP11-54O7.17  | 0.348 | 0.003 |
| RP11-560F18.1 | 0.262 | 0.026 |
| RP11-609D21.3 | 0.315 | 0.007 |
| RP11-77H9.8   | 0.234 | 0.048 |
| RP3-449M8.9   | 0.246 | 0.037 |
| RP3-467D16.3  | 0.459 | 0.000 |
| RP4-718J7.4   | 0.235 | 0.047 |
| RUNDC3A       | 0.322 | 0.006 |
| RUNDC3A-AS1   | 0.272 | 0.021 |
| SMTNL1        | 0.249 | 0.035 |
| TEKT1         | 0.260 | 0.027 |
| THEM5         | 0.236 | 0.046 |
| TMEM56        | 0.237 | 0.045 |
| TPRG1-AS1     | 0.247 | 0.037 |
| TROAP         | 0.319 | 0.006 |
| UNC93B3       | 0.285 | 0.015 |
| XK            | 0.233 | 0.049 |
| ZDHHC4P1      | 0.276 | 0.019 |

**Supplemental Table 2: List of 81 Genes that Positively Correlated with the QA/KA Ratio.** The first 38 listed genes, in **bold**, indicate interferon-stimulated genes.

| Gene             | $r_s$ | $p$    |
|------------------|-------|--------|
| <b>ATF3</b>      | 0.250 | 0.034  |
| <b>BCL2L14</b>   | 0.345 | 0.003  |
| <b>C2orf66</b>   | 0.301 | 0.010  |
| <b>CCL2</b>      | 0.370 | 0.001  |
| <b>CCL8</b>      | 0.495 | <0.001 |
| <b>CCNA1</b>     | 0.260 | 0.028  |
| <b>CCNB2</b>     | 0.268 | 0.023  |
| <b>CDCA2</b>     | 0.239 | 0.043  |
| <b>CDK1</b>      | 0.311 | 0.008  |
| <b>CXCL10</b>    | 0.278 | 0.018  |
| <b>DLGAP5</b>    | 0.283 | 0.016  |
| <b>DTL</b>       | 0.278 | 0.018  |
| <b>E2F8</b>      | 0.390 | 0.001  |
| <b>EMP1</b>      | 0.283 | 0.016  |
| <b>EPHB2</b>     | 0.261 | 0.027  |
| <b>IGHV4-59</b>  | 0.257 | 0.029  |
| <b>IGHV4-61</b>  | 0.243 | 0.040  |
| <b>IGKV1-17</b>  | 0.284 | 0.015  |
| <b>IGKV1D-33</b> | 0.248 | 0.036  |
| <b>IL10</b>      | 0.254 | 0.031  |
| <b>KCTD14</b>    | 0.270 | 0.022  |
| <b>KLHDC7B</b>   | 0.327 | 0.005  |
| <b>LAMP3</b>     | 0.250 | 0.034  |
| <b>LAP3</b>      | 0.233 | 0.049  |
| <b>LIF</b>       | 0.340 | 0.004  |
| <b>MCM10</b>     | 0.327 | 0.005  |
| <b>MELK</b>      | 0.276 | 0.019  |
| <b>MOXD1</b>     | 0.258 | 0.029  |
| <b>MS4A4A</b>    | 0.345 | 0.003  |
| <b>MT1E</b>      | 0.249 | 0.035  |
| <b>NKAIN1</b>    | 0.259 | 0.028  |
| <b>PBK</b>       | 0.273 | 0.020  |
| <b>RMI2</b>      | 0.236 | 0.046  |
| <b>RRM2</b>      | 0.293 | 0.013  |
| <b>RUFY4</b>     | 0.255 | 0.030  |
| <b>SDC1</b>      | 0.279 | 0.018  |
| <b>SLC12A8</b>   | 0.410 | <0.001 |
| <b>SOCS1</b>     | 0.276 | 0.019  |
| AC006160.5       | 0.342 | 0.003  |

|               |       |        |
|---------------|-------|--------|
| AP001626.1    | 0.259 | 0.028  |
| C1orf226      | 0.245 | 0.038  |
| CAV1          | 0.246 | 0.037  |
| CDC20P1       | 0.256 | 0.030  |
| CDC42P3       | 0.420 | <0.001 |
| CDC45         | 0.265 | 0.025  |
| CEP55         | 0.296 | 0.012  |
| CKAP2L        | 0.289 | 0.014  |
| CTA-384D8.31  | 0.283 | 0.016  |
| DLGAP1        | 0.238 | 0.044  |
| IGFL2         | 0.370 | 0.001  |
| IGKJ3         | 0.266 | 0.024  |
| IGKV1-33      | 0.255 | 0.031  |
| IGKV1-6       | 0.267 | 0.024  |
| IGKV1-8       | 0.259 | 0.028  |
| IGKV1D-8      | 0.269 | 0.023  |
| IGKV2-40      | 0.245 | 0.038  |
| IGKV2D-40     | 0.248 | 0.036  |
| IGKV3D-20     | 0.242 | 0.041  |
| IGLJ6         | 0.256 | 0.030  |
| IGLJ7         | 0.308 | 0.009  |
| IGLV1-40      | 0.253 | 0.032  |
| IGLV1-50      | 0.251 | 0.034  |
| IGLV2-28      | 0.288 | 0.014  |
| IGLV3-1       | 0.236 | 0.046  |
| IGLV5-37      | 0.319 | 0.006  |
| IGLV6-57      | 0.271 | 0.022  |
| IQGAP3        | 0.241 | 0.041  |
| LIPM          | 0.272 | 0.021  |
| MAP6          | 0.267 | 0.023  |
| MT2P1         | 0.262 | 0.026  |
| PTGFR         | 0.233 | 0.049  |
| RGS13         | 0.278 | 0.018  |
| RP11-10L7.1   | 0.334 | 0.004  |
| RP11-239E10.2 | 0.276 | 0.019  |
| RP11-439M11.1 | 0.260 | 0.027  |
| RP11-466G12.3 | 0.237 | 0.045  |
| SKA1          | 0.318 | 0.007  |
| TICRR         | 0.235 | 0.047  |
| TMEM178B      | 0.370 | 0.001  |
| TTK           | 0.334 | 0.004  |
| TYMSOS        | 0.396 | 0.001  |

**Reference**

1. Moffett JR, Arun P, Puthillathu N, et al. Quinolate as a Marker for Kynurenine Metabolite Formation and the Unresolved Question of NAD(+) Synthesis During Inflammation and Infection. *Front Immunol* 2020;11:31.
